# Supplementary material for: Clinical Effectiveness and Pharmacokinetics of Dalbavancin in Treatment-Experienced Patients with Skin, Osteoarticular, or Vascular Infections
Source: MDPI journal article supplement (doi:10.3390/pharmaceutics14091882), 2022-09-06
Supplement: s1 [file s1]

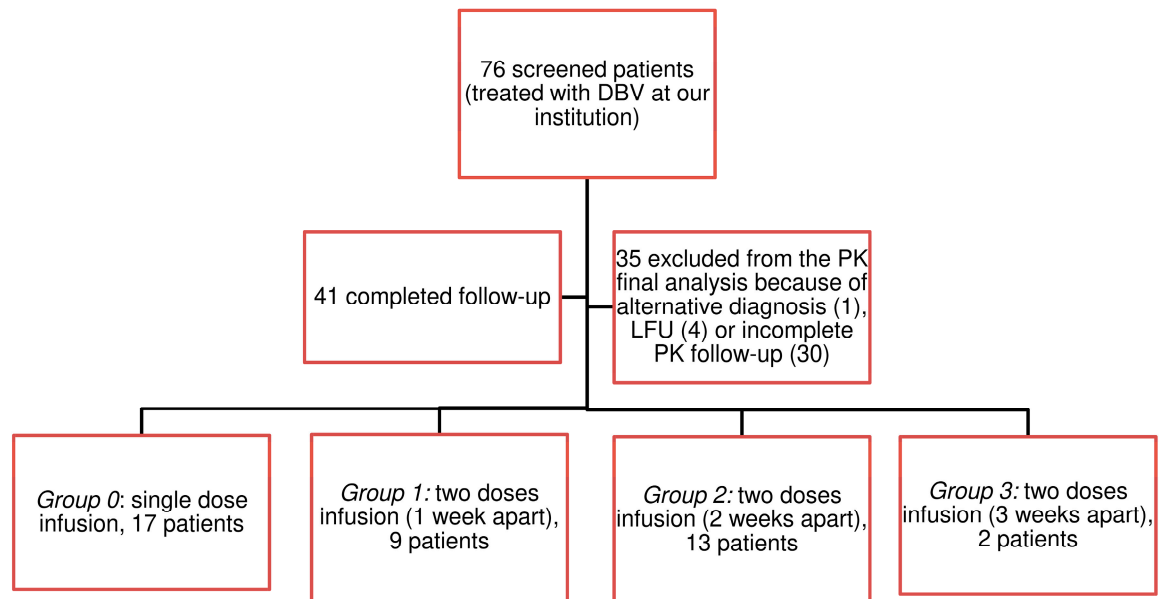

**Figure S1.** Flow in the selection of patients from screening to complete follow-up. DBV: dalbavancin; LFU: lost to follow-up; PK: pharmacokinetic.

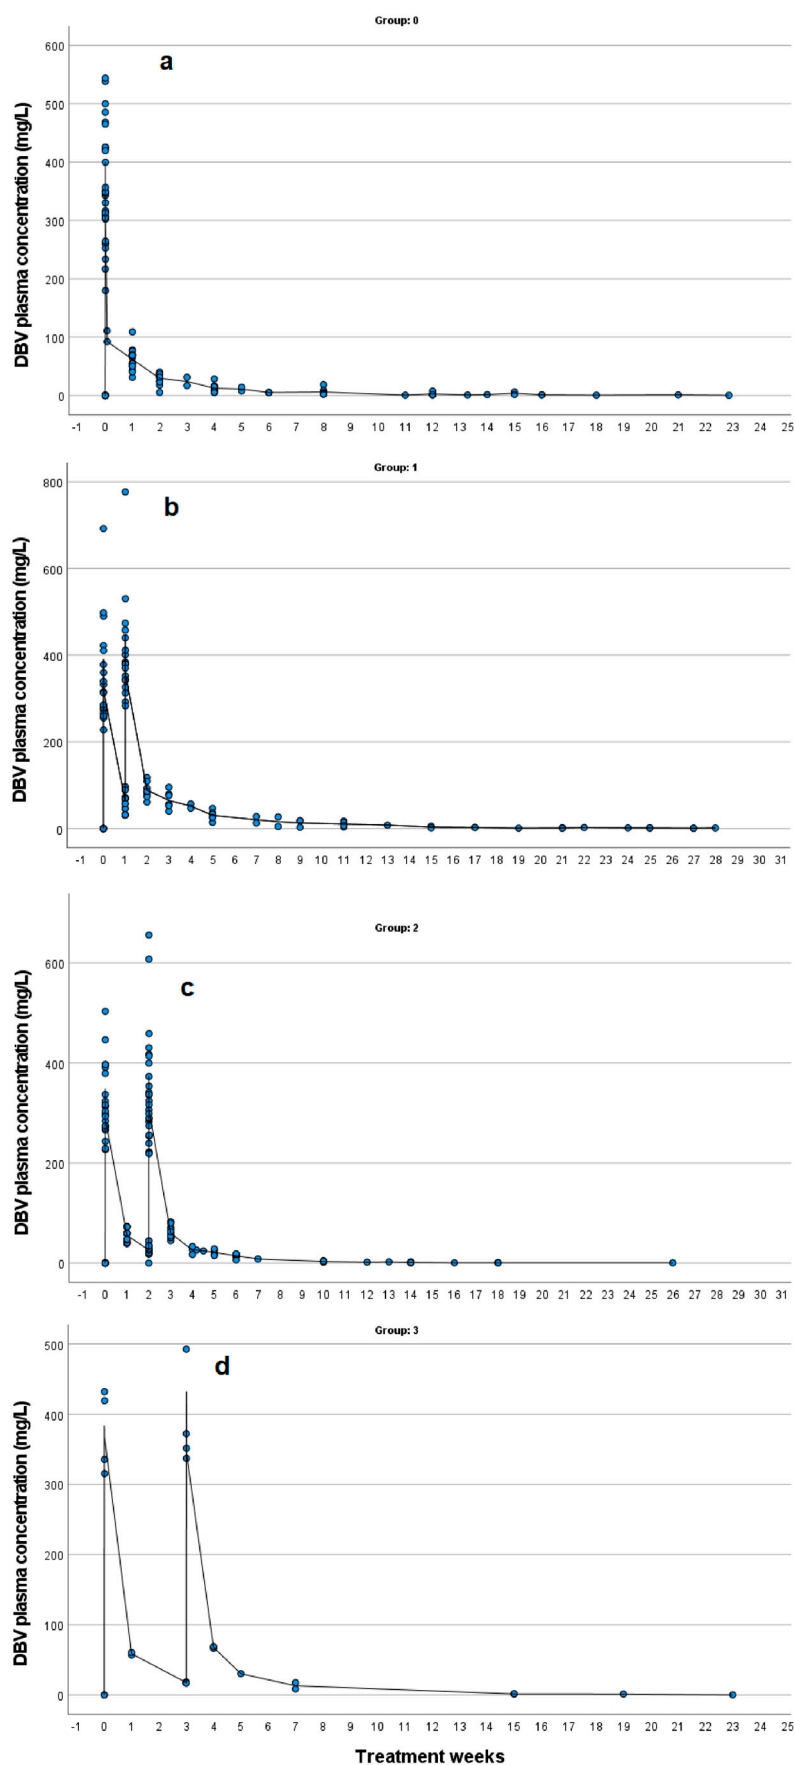

**Figure S2.** Mean PK profiles in each treatment group. Panel (a) group 0; Panel (b) Group 1; Panel (c) group 2; Panel (d) group 3. X axis = time from the first dose (weeks).
